# Supplementary material for: FOXA1 Gene Expression for Defining Molecular Subtypes of Muscle-Invasive Bladder Cancer after Radical Cystectomy
Source: MDPI journal article supplement (doi:10.3390/jcm9040994), 2020-04-02
Supplement: s1 [file s1]

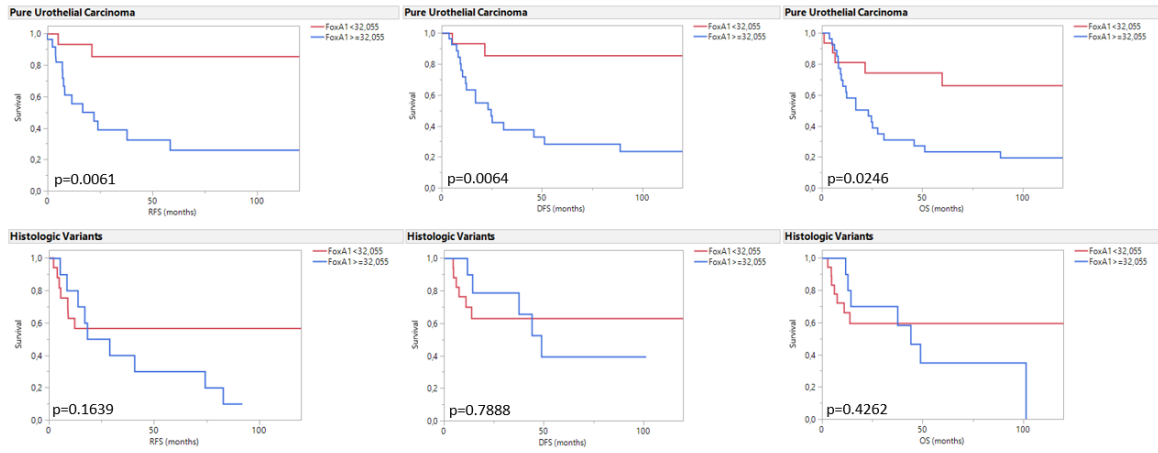

**Figure S1.** Kaplan–Meier analysis for RFS, DFS, and OS based on FOXA1 mRNA expression within the Mannheim cohort in patients with pure urothelial carcinoma and patients with histologic variants.

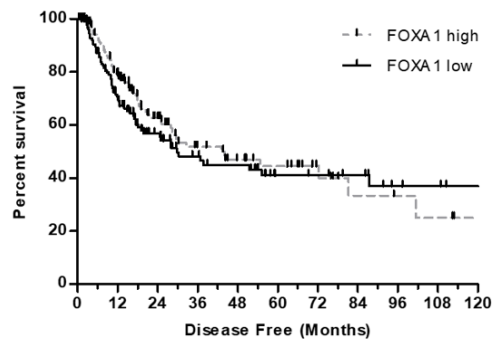

**Figure S2.** Kaplan–Meier analysis for disease specific survival based on FOXA1 mRNA expression within the TCGA cohort.

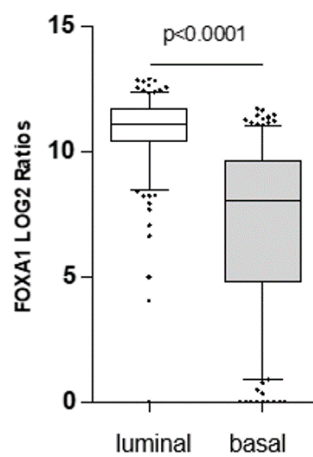

**Figure S3.** Distribution of normalized mRNA expression of FOXA1 within the basal and luminal subtypes defined by a 47-gene panel (BASE47) within the TCGA cohort.
